# Supplementary material for: Identification and Quantification of Urinary Microbial Phenolic Metabolites by HPLC-ESI-LTQ-Orbitrap-HRMS and Their Relationship with Dietary Polyphenols in Adolescents
Source: MDPI journal article supplement (doi:10.3390/antiox11061167), 2022-06-14
Supplement: s1 [file s1]

# Identification and quantification of urinary microbial phenolic metabolites by HPLC-ESI-LTQ-Orbitrap-HRMS and their relationship with dietary polyphenols in adolescents.

## Supplementary Data

### Table of contents

- **Standards and chemicals:** Commercial sources of standards and chemicals employed in the study.
- **Analytical condition testing before validation HPLC/ESI-LTQ-Orbitrap-HRMS method**
- **Figure S1.** Recovery obtained according to different solid phase extraction and reverse-phase chromatographic columns (Kinetex F5 (50 x 4.6 mm i.d., 2.6  $\mu$ m) and Atlantis T3 C18 (100 x 2.1 mm i.d., 3  $\mu$ m).
- **Figure S2.** Postpreparative stability. Mean concentrations ( $\mu$ g/L) of phenolic compounds recovered at the start (t = 0) and at 24 h with two standard concentrations prepared in synthetic urine.
- **Figure S3.** General characteristics of participants according to gender.
- **Figure S4.** Principal component (PC) biplot of subclass of microbial phenolic metabolites (MPM) according to tertiles of total polyphenol intake ( $n=546$ ).
- **Figure S5.** Heatmap of the Pearson correlation between subclass of microbial phenolic metabolites and polyphenol-rich food intake in adolescents.
- **Table S1.** Recovery obtained in Oasis HLB and HLB prime.
- **Table S2.** Validation data: Linearity ranges, coefficient of determination, and low limits of detection and quantification of microbial phenolic metabolites.
- **Table S3.** Intra- and inter-day precision and accuracy, matrix effect and recovery results for three concentration levels (high, medium, and low); RSD (%) was calculated for the recovery values for three replicates.
- **Table S4.** Identification of microbial phenolic metabolites in urine by HPLC/ESI-LTQ-Orbitrap-HRMS.
- **Table S5.** Pearson correlation coefficients between microbial phenolic metabolites and dietary polyphenols in adolescents.
- **References**

---

### Standards and chemicals

Gallic acid, 3-hydroxytyrosol, protocatechuic acid, 4-hydroxybenzoic acid, 3,4-dihydroxyphenylpropionic acid, 3'-hydroxyphenylacetic acid, *o*-coumaric acid, *m*-coumaric acid, *p*-coumaric acid, enterodiol, urolithin-A, and urolithin-B were purchased from Sigma-Aldrich (St. Louis, MO, USA). 3'-hydroxytyrosol-3'-glucuronide, dihydroresveratrol, and (+)*cis*, *trans*-abscisic acid D<sub>6</sub> were obtained from Santa Cruz (Santa Cruz Biotechnology, Santa Cruz, CA). 3-hydroxybenzoic acid, vanillic acid, syringic acid, enterolactone, and creatinine were purchased from Fluka (St. Louis, MO, USA). Standards were stored in powder form and protected from light. Methanol (MeOH) of LC-MS and acetonitrile (MeCN) of HPLC grade were obtained from Sigma-Aldrich (St. Louis, MO, USA), formic acid ( $\geq 98\%$ ) from Panreac Química S.A. (Barcelona, Spain), and ultrapure water (Milli-Q) from a Millipore system (Bedford, USA).

## Analytical condition testing before validation HPLC/ESI-LTQ-Orbitrap-HRMS method

### - Solid phase extraction (SPE) cartridge selection

Two different chemical cartridges, Waters Oasis HLB (hydrophilic-lipophilic-balance cartridge) 96-well plates 30  $\mu\text{m}$  (30 mg) and Oasis PRiME HLB 96-well plates 3 mg, for the extraction of 3-hydroxybenzoic acid, 3-hydroxytyrosol, 3'-hydroxytyrosol-3'-glucuronide, protocatechuic acid, 4-hydroxybenzoic acid, vanillic acid, syringic acid, enterodiol, enterolactone, urolithin-B, gallic acid, dihydroresveratrol, urolithin-A, 3,4-dihydroxyphenylpropionic acid, 3'-hydroxyphenylacetic acid, *o*-coumaric acid, *m*-coumaric acid, and *p*-coumaric acid. Synthetic urine was spiked with 1000  $\mu\text{g/L}$  of phenolic standards, and 500  $\mu\text{g/L}$  of internal standard. Oasis HLB procedure was performed using the method previously describe by Martínez-Huélamo et al. for the analysis of polyphenols and their metabolites in urine samples, with some modifications [1]. Briefly, cartridges were activated with 1 mL of methanol (MeOH) and 1 mL of 0.1% formic acid. After loading 1 mL of acidified sample, clean-up was performed with 1 mL of 0.1% formic acid and 0.5% MeOH, and the elution with 1 mL MeOH acidified with 0.1% of formic acid. The eluted fraction was evaporated to dryness under a stream of nitrogen and reconstituted with 100  $\mu\text{L}$  of 0.1% formic acid in water. To assess extraction recovery, blank synthetic urine extract spiked after SPE were also prepared at the same concentration (Table S1).

### - Optimization of SPE using different solutions

After the selection of Waters Oasis HLB 96-well plates 30  $\mu\text{m}$  (30 mg) as cartridge for the SPE, four different SPE procedures were tested to obtain higher extraction of 3-hydroxybenzoic acid, 3-hydroxytyrosol, 3'-hydroxytyrosol-3'-glucuronide, protocatechuic acid, 4-hydroxybenzoic acid, vanillic acid, syringic acid, enterodiol, enterolactone, urolithin-B, gallic acid, dihydroresveratrol, urolithin-A, 3,4-dihydroxyphenylpropionic acid, 3'-hydroxyphenylacetic acid, *o*-coumaric acid, *m*-coumaric acid, and *p*-coumaric acid.

Synthetic urine was spiked with 400  $\mu\text{g/L}$  of phenolic standards and internal standard. These procedures were performed using the methods previously described by Martínez-Huélamo et al. and Quifer-Rada [1–3], with some modifications, following the next extractions:

- *SPE 1*: cartridges were activated with 1 mL of methanol (MeOH) and 1 mL of 0.1% formic acid. After loading 1 mL of acidified sample, clean-up was performed with 1 mL of 0.1% formic acid and 0.5% MeOH, and the elution with 1 mL MeOH acidified with 0.1% of formic acid. The eluted fraction was evaporated to dryness under a stream of nitrogen and reconstituted with 100  $\mu\text{L}$  of 0.05% formic acid in water.
- *SPE 2*: cartridges were activated with 1 mL of methanol (MeOH) and 1 mL of 1.5 M formic acid. After loading 1 mL of sample, clean-up was performed with 0.5 mL of 1.5 M formic acid and 0.5% MeOH, and the elution with 1 mL MeOH acidified with 0.1% of formic acid. The eluted fraction was evaporated to dryness under a stream of nitrogen and reconstituted with 100  $\mu\text{L}$  of 0.05% formic acid in water.
- *SPE 3*: cartridges were activated with 1 mL of methanol (MeOH) and 1 mL of 1.5 M formic acid. After loading 1 mL of sample, clean-up was performed with 0.5 mL of 1.5 M formic acid and 0.5 mL of 5% MeOH, and the elution with 1 mL MeOH acidified with 0.1% of formic acid. The eluted fraction was evaporated to dryness under a stream of nitrogen and reconstituted with 100  $\mu\text{L}$  of 0.05% formic acid in water.
- *SPE 4*: cartridges were activated with 1 mL of methanol (MeOH) and 1 mL of 1% formic acid. After loading 1 mL of acidified sample, clean-up was performed with 1 mL of 1% formic acid and 2% MeOH, and the elution with 1 mL MeOH acidified with 0.1% of formic acid. The eluted fraction was evaporated to dryness under a stream of nitrogen and reconstituted with 100  $\mu\text{L}$  of 0.05% formic acid in water.

### - Chromatographic column selection

Two different reverse-phase chromatographic columns were tested: Kinetex F5 (50 x 4.6 mm i.d., 2.6  $\mu\text{m}$ ) (Phenomenex, Torrance, CA, USA) and Atlantis T3 C18 (100 x 2.1 mm i.d., 3  $\mu\text{m}$ ) (Waters, Milford, MA, USA) (Figure S1).

## Figures

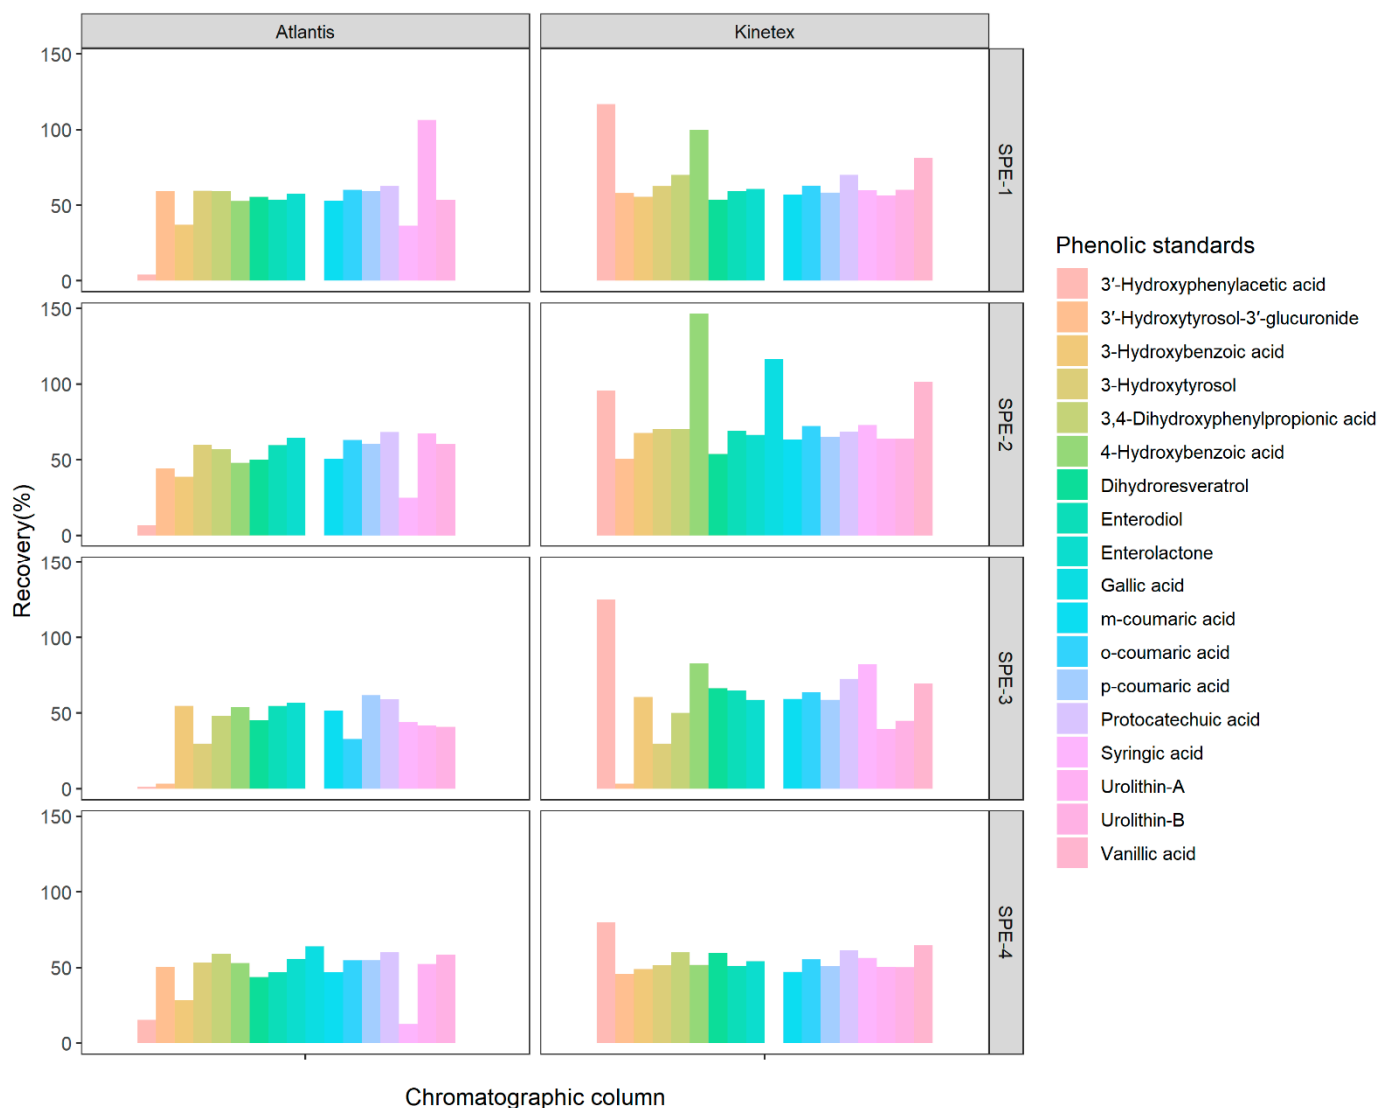

**Figure S1.** Recovery obtained according to different solid phase extraction and reverse-phase chromatographic columns (Kinetex F5 (50 × 4.6 mm i.d., 2.6 μm) and Atlantis T3 C18 (100 × 2.1 mm i.d., 3 μm)).

*SPE-1:* cartridges were activated with 1 mL of methanol (MeOH) and 1 mL of 0.1% formic acid. After loading 1 mL of acidified sample, clean-up was performed with 1 mL of 0.1% formic acid and 0.5% MeOH, and the elution with 1 mL MeOH acidified with 0.1% of formic acid. The eluted fraction was evaporated to dryness under a stream of nitrogen and reconstituted with 100 μL of 0.05% formic acid in water.

*SPE-2:* cartridges were activated with 1 mL of methanol (MeOH) and 1 mL of 1.5 M formic acid. After loading 1 mL of sample, clean-up was performed with 0.5 mL of 1.5 M formic acid and 0.5% MeOH, and the elution with 1 mL MeOH acidified with 0.1% of formic acid. The eluted fraction was evaporated to dryness under a stream of nitrogen and reconstituted with 100 μL of 0.05% formic acid in water.

*SPE-3:* cartridges were activated with 1 mL of methanol (MeOH) and 1 mL of 1.5 M formic acid. After loading 1 mL of sample, clean-up was performed with 0.5 mL of 1.5 M formic acid and 0.5 mL of 5% MeOH, and the elution with 1 mL MeOH acidified with

0.1% of formic acid. The eluted fraction was evaporated to dryness under a stream of nitrogen and reconstituted with 100  $\mu$ L of 0.05% formic acid in water.

*SPE-4*: cartridges were activated with 1 mL of methanol (MeOH) and 1 mL of 1% formic acid. After loading 1 mL of acidified sample, clean-up was performed with 1 mL of 1% formic acid and 2% MeOH, and the elution with 1 mL MeOH acidified with 0.1% of formic acid. The eluted fraction was evaporated to dryness under a stream of nitrogen and reconstituted with 100  $\mu$ L of 0.05% formic acid in water.

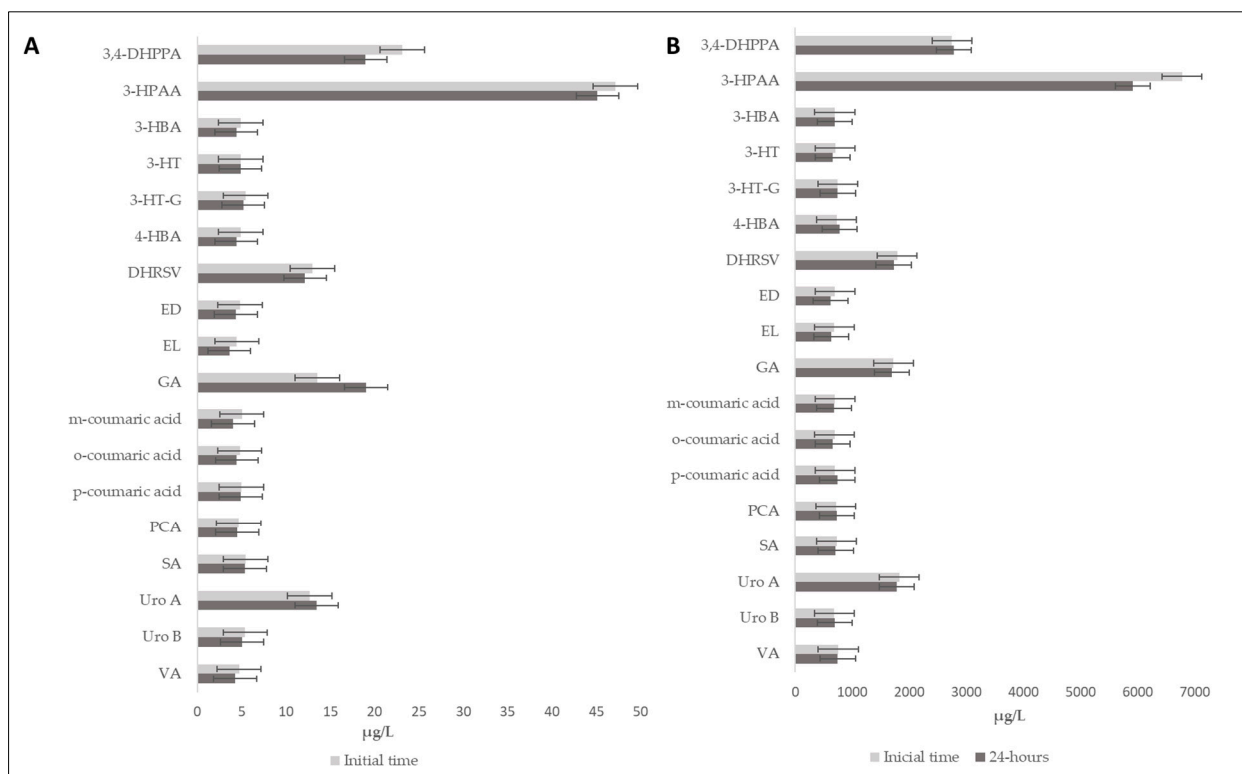

**Figure S2.** Postpreparative stability. Mean concentrations ( $\mu$ g/L) and SEM of phenolic compounds recovered at 0 h ( $t = 0$ ) and at 24 h with two standard concentrations prepared in synthetic urine. **A**: stability of the low concentration ( $5 \mu\text{g L}^{-1}$  for 3-HBA, 3-HT, 3-HT-G, PCA, 4-HBA, VA, SA, *p,m,o*-coumaric acids, ED, EL, Uro B;  $12.5 \mu\text{g L}^{-1}$  for GA, DHRSV, and Uro A;  $25 \mu\text{g L}^{-1}$  for 3,4-DHPPA,  $50 \mu\text{g L}^{-1}$  for 3-HPAA). **B**: stability of the high concentration ( $766 \mu\text{g L}^{-1}$  for 3-HBA, 3-HT, 3-HT-G, PCA, 4-HBA, VA, SA, *p,m,o*-coumaric acids, ED, EL, Uro B;  $1915 \mu\text{g L}^{-1}$  for GA, DHRSV, and Uro A;  $3830 \mu\text{g L}^{-1}$  for 3,4-DHPPA,  $7660 \mu\text{g L}^{-1}$  for 3-HPAA). 3,4-DHPPA 3,4-dihydroxyphenylpropionic acid, 3-HPAA 3-hydroxyphenylacetic acid, 3-HBA 3-hydroxybenzoic acid, 3-HT 3-hydroxytyrosol, 3-HT-G 3-hydroxytyrosol glucuronide, 4-HBA 4-hydroxybenzoic acid, DHRSV dihydroresveratrol, ED enterodiol, EL enterolactone, GA gallic acid, PCA protocatechuic acid, SA syringic acid, Uro A urolithin A, Uro B urolithin B, VA vanillic acid.

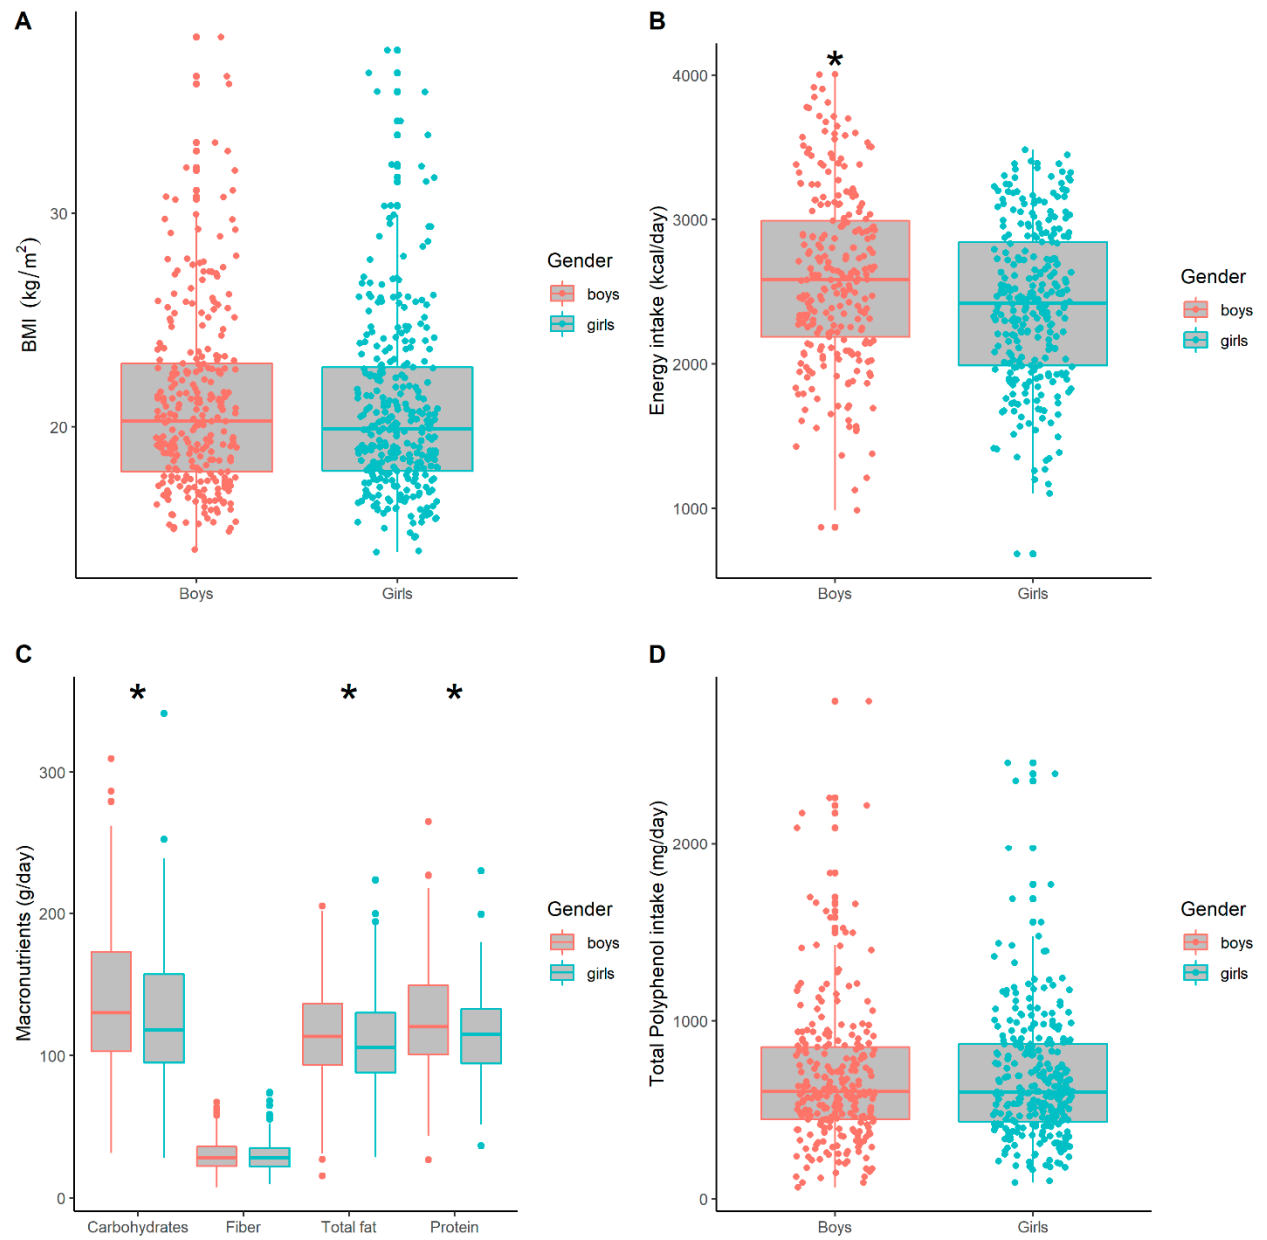

**Figure S3.** Boxplot of general characteristics of participants according to gender.

BMI body mass index. **A:** BMI (kg/m<sup>2</sup>), **B:** Total Energy Intake (kcal/day), **C:** Macronutrients (g/day), **D:** Total polyphenol intake (mg/day). \* *p*-values < 0.05 from T-test analysis.

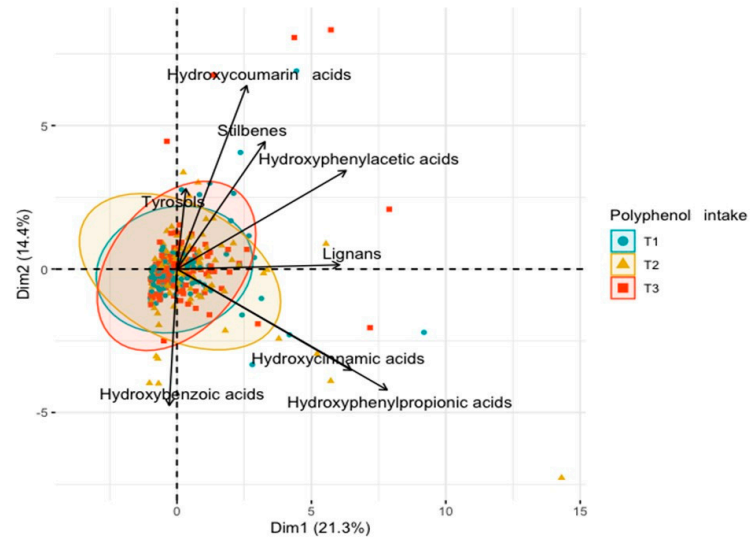

**Figure S4.** Principal Component (PC) biplot of subclass of microbial phenolic metabolites (MPM) according to tertiles of total polyphenol intake ( $n=546$ ).

PC1, accounting for 21.33% of the total variance, included lignans; and PC2, accounting for 14.40%, included hydroxycoumarinic acids, hydroxybenzoic acids, tyrosols, and stilbenes.



**Table S1.** Recovery obtained in Oasis HLB and PRiME HLB.

| Phenolic standard                 | Recovery (%) | Recovery (%) |
|-----------------------------------|--------------|--------------|
|                                   | HLB          | PRiME HLB    |
| Dihydroresveratrol                | 75%          | 71%          |
| 3,4-Dihydroxyphenylpropionic acid | 62%          | 55%          |
| Enterodiol                        | 69%          | 76%          |
| Enterolactone                     | 69%          | 81%          |
| Gallic acid                       | 94%          | 84%          |
| 3-Hydroxybenzoic acid             | 89%          | 85%          |
| 4-Hydroxybenzoic acid             | 83%          | 75%          |
| 3'-Hydroxyphenylacetic acid       | 79%          | 77%          |
| 3-Hydroxytyrosol                  | 86%          | 78%          |
| 3'-Hydroxytyrosol-3'-glucuronide  | 83%          | 75%          |
| m-coumaric acid                   | 85%          | 73%          |
| o-coumaric acid                   | 106%         | 101%         |
| p-coumaric acid                   | 89%          | 88%          |
| Protocatechuic acid               | 98%          | 88%          |
| Syringic acid                     | 105%         | 87%          |
| Urolithin-A                       | 96%          | 58%          |
| Urolithin-B                       | 68%          | 40%          |
| Vanillic acid                     | 82%          | 68%          |

HBL (hydrophilic-lipophilic-balance cartridge). After the selection of Waters Oasis HLB 96-well plates 30  $\mu$ m (30 mg) as cartridge for the SPE due its higher recovery, four different SPE procedures were tested to obtain higher extraction of phenolic standards. More details are available in "Analytical condition testing before validation HPLC/ESI-LTQ-Orbitrap-HRMS method" from this supplementary data.



**Table S2.** Characteristics of the validation of the HPLC/ESI-LTQ-Orbitrap-HRMS method: Linearity ranges, coefficient of determination, and low limits of detection and quantification of microbial phenolic metabolites.

| Compounds                         | Rt (min) | Linearity Range (µg/L) | Calibration Curve Equation           | R <sup>2</sup> | LOD (µg/L) | LOQ (µg/L) |
|-----------------------------------|----------|------------------------|--------------------------------------|----------------|------------|------------|
| Gallic acid                       | 1.69     | 2.5–2500               | $Y=1875.73x-0.381799x^2+14499.5$     | 0.9988         | 0.35       | 1.16       |
| 3-Hydroxytyrosol                  | 2.11     | 1–1000                 | $Y = 1582.99x-0.627282x^2+3434.06$   | 0.9984         | 0.13       | 0.43       |
| 3'-Hydroxytyrosol-3'-glucuronide  | 2.11     | 1–1000                 | $Y=2284.9x-1.07371x^2+3850.89$       | 0.9982         | 0.19       | 0.64       |
| Protocatechuic acid               | 2.25     | 1–1000                 | $Y = 2456.96x-1.16492x^2+5769.12$    | 0.9979         | 0.04       | 0.13       |
| 4-Hydroxybenzoic acid             | 3.15     | 1–1000                 | $Y = 1603.96x-0.383033x^2+5829.04$   | 0.9992         | 0.06       | 0.20       |
| 3,4-dihydroxyphenylpropionic acid | 3.84     | 5–5000                 | $Y = 1584.35x-0.185698x^2+26132.5$   | 0.9975         | 0.33       | 1.11       |
| 3-Hydroxybenzoic acid             | 4.02     | 1–1000                 | $Y = 1390.37x-0.660198x^2+937.023$   | 0.9972         | 0.21       | 0.71       |
| 3'-Hydroxyphenylacetic acid       | 4.09     | 10–100000              | $Y = 126.989x-0.00834377x^2-169.942$ | 0.9979         | 3.29       | 10.96      |
| Vanillic acid                     | 4.74     | 1–1000                 | $Y = 453.431x-0.023629x^2+304.713$   | 0.9977         | 0.18       | 0.61       |
| Syringic acid                     | 5.63     | 1–1000                 | $Y = 1000.29x-0.180888x^2-981.368$   | 0.9984         | 0.16       | 0.53       |
| <i>p</i> -Coumaric acid           | 5.96     | 1–1000                 | $Y = 3148.49x-1.46337x^2+1029.2$     | 0.9989         | 0.11       | 0.36       |
| <i>m</i> -Coumaric acid           | 6.54     | 1–1000                 | $Y = 2498.93x-1.00467x^2+10900.8$    | 0.9990         | 0.10       | 0.32       |
| <i>o</i> -Coumaric acid           | 7.20     | 1–1000                 | $Y = 2340.75x-1.03397x^2-432.812$    | 0.9988         | 0.23       | 0.77       |
| Dihydroresveratrol                | 8.73     | 2.50-2500              | $Y = 678.148x-0.0970142x^2-1417.62$  | 0.9992         | 0.56       | 1.85       |
| Enterodiol                        | 9.17     | 1–1000                 | $Y = 3931.4x-1.75738x^2+5384.13$     | 0.9979         | 0.05       | 0.18       |
| Urolithin A                       | 9.56     | 2.50–2500              | $Y = 484.123x-0.0277372x^2-3593.79$  | 0.9994         | 0.61       | 2.03       |
| Enterolactone                     | 10.80    | 1–1000                 | $Y = 4229.75x-1.81222x^2+16770$      | 0.9956         | 0.02       | 0.06       |
| Urolithin B                       | 11.12    | 1–1000                 | $Y = 1661.47x-0.424359x^2-3176.34$   | 0.9990         | 0.18       | 0.58       |

Rt retention time, R<sup>2</sup> coefficient of determination, LOD limit of detection, LOQ limit of quantification.

**Table S3.** Intra- and inter-day precision and accuracy, matrix effect and recovery results for three concentration levels (high, medium, and low); RSD (%) was calculated for the recovery values for three replicates.

| Compound                          | Concentration (µg/L) | Intra-day assay  |              | Inter-day assay  |              | Matrix effect average (%) (CV) | Recovery Average (%) (CV) |
|-----------------------------------|----------------------|------------------|--------------|------------------|--------------|--------------------------------|---------------------------|
|                                   |                      | Precision (RSD%) | Accuracy (%) | Precision (RSD%) | Accuracy (%) |                                |                           |
| Gallic acid                       | 12.5                 | 7.4              | 113.4        | 58.1             | 30.8         | 65.8 (4.6)                     | 70.1 (4.8)                |
|                                   | 500                  | 8.8              | 116.6        | 13.7             | 102.6        | 84.2 (0.7)                     | 88.1 (2.3)                |
|                                   | 1915                 | 11.7             | 87.3         | 13.3             | 86.3         | 88.9 (0.4)                     | 94.0 (1.1)                |
| 3-Hydroxytyrosol                  | 5                    | 3.9              | 99.8         | 31.1             | 81.8         | 116.5 (0.2)                    | 70.1 (1.5)                |
|                                   | 200                  | 6.6              | 101.3        | 10.1             | 91.3         | 88.5 (0.1)                     | 78.1 (6.8)                |
|                                   | 766                  | 11.0             | 90.8         | 5.2              | 90.9         | 94.3 (0.8)                     | 89.6 (4.2)                |
| 3'-Hydroxytyrosol-3'-glucuronide  | 5                    | 4.3              | 107.8        | 15.5             | 92.4         | 80.4 (1.8)                     | 98.7 (1.7)                |
|                                   | 200                  | 6.1              | 102.9        | 0.6              | 102.2        | 101.8 (1.7)                    | 82.5 (11.2)               |
|                                   | 766                  | 8.1              | 90.4         | 5.6              | 90.9         | 95.1 (0.2)                     | 87.4 (4.6)                |
| Protocatechuic acid               | 5                    | 5.0              | 90.2         | 11.9             | 86.5         | 81.5 (0.3)                     | 84.1 (0.6)                |
|                                   | 200                  | 3.9              | 101.4        | 8.6              | 106.0        | 90.5 (1.6)                     | 88.3 (2.7)                |
|                                   | 766                  | 7.0              | 90.9         | 9.2              | 96.2         | 91.8 (0.2)                     | 93.9 (4.2)                |
| 4-Hydroxybenzoic acid             | 5                    | 0.7              | 99.1         | 2.6              | 101.8        | 125.8 (0.0)                    | 78.1 (0.7)                |
|                                   | 200                  | 4.0              | 96.6         | 5.2              | 100.5        | 101.5 (1.5)                    | 86.7 (3.5)                |
|                                   | 766                  | 6.3              | 97.4         | 4.9              | 101.8        | 99.1 (0.7)                     | 90.5 (1.8)                |
| 3,4-dihydroxyphenylpropionic acid | 25                   | 8.1              | 95.1         | 26.6             | 13.6         | 100.9 (3.6)                    | 71.7 (2.7)                |
|                                   | 1000                 | 7.2              | 117.9        | 7.2              | 113.5        | 98.4 (0.9)                     | 92.9 (0.4)                |
|                                   | 3830                 | 10.7             | 81.3         | 2.2              | 83.2         | 95.8 (1.3)                     | 96.4 (2.2)                |
| 3-Hydroxybenzoic acid             | 5                    | 5.3              | 97.9         | 4.6              | 93.1         | 88.9 (1.4)                     | 104.0 (1.8)               |
|                                   | 200                  | 5.7              | 103.4        | 3.6              | 104.4        | 89.1 (1.4)                     | 95.5 (8.6)                |
|                                   | 766                  | 4.3              | 91.5         | 3.1              | 88.5         | 93.6 (0.1)                     | 96.2 (2.9)                |
| 3-Hydroxyphenylacetic acid        | 50                   | 2.8              | 94.8         | 2.0              | 92.6         | 91.3 (3.3)                     | 80.2 (1.8)                |
|                                   | 2000                 | 3.3              | 101.1        | 9.0              | 111.5        | 114.0 (0.2)                    | 83.5 (1.3)                |
|                                   | 7660                 | 1.7              | 88.3         | 8.4              | 80.9         | 101.6 (1.7)                    | 94.2 (0.0)                |
| Vanillic acid                     | 5                    | 0.4              | 94.4         | 14.3             | 86.7         | 110.8 (0.5)                    | 96.0 (4.2)                |
|                                   | 200                  | 4.4              | 94.4         | 4.4              | 93.9         | 91.5 (1.2)                     | 91.1 (6.9)                |
|                                   | 766                  | 6.2              | 97.8         | 2.3              | 96.1         | 96.1 (2.2)                     | 91.9 (10.4)               |
| Syringic acid                     | 5                    | 2.6              | 110.5        | 6.5              | 106.8        | 77.5 (3.6)                     | 104.5 (0.4)               |
|                                   | 200                  | 4.2              | 99.1         | 5.2              | 97.5         | 93.1 (0.0)                     | 88.8 (4.2)                |

|                         |      |      |       |      |       |             |             |
|-------------------------|------|------|-------|------|-------|-------------|-------------|
|                         | 766  | 7.1  | 97.4  | 3.5  | 94.8  | 91.3 (0.3)  | 97.6 (2.0)  |
| <i>p</i> -Coumaric acid | 5    | 2.3  | 99.2  | 8.6  | 94.6  | 83.2 (0.2)  | 101.4 (0.8) |
|                         | 200  | 3.2  | 101.7 | 6.9  | 105.8 | 93.5 (0.8)  | 90.8 (3.0)  |
|                         | 766  | 5.7  | 89.6  | 6.0  | 93.2  | 101.8 (0.3) | 95.5 (1.1)  |
| <i>m</i> -Coumaric acid | 5    | 4.3  | 98.3  | 4.3  | 63.9  | 110.8 (0.5) | 73.8 (0.2)  |
|                         | 200  | 0.9  | 100.0 | 4.7  | 100.8 | 94.7 (0.7)  | 87.4 (1.4)  |
|                         | 766  | 7.8  | 93.1  | 1.2  | 94.0  | 94.2 (0.2)  | 97.6 (3.2)  |
| <i>o</i> -Coumaric acid | 5    | 0.7  | 95.5  | 10.5 | 89.2  | 75.5 (2.6)  | 95.0 (0.8)  |
|                         | 200  | 2.1  | 101.5 | 4.6  | 104.0 | 87.5 (1.3)  | 85.8 (0.1)  |
|                         | 766  | 5.5  | 92.7  | 2.2  | 93.1  | 89.5 (0.1)  | 96.2 (0.4)  |
| Dihydroresveratrol      | 12.5 | 1.4  | 105.0 | 10.2 | 106.5 | 60.7 (5.1)  | 79.1 (1.3)  |
|                         | 500  | 2.9  | 100.8 | 11.7 | 101.4 | 66.6 (5.8)  | 83.0 (4.5)  |
|                         | 1915 | 8.7  | 98.3  | 9.9  | 100.3 | 79.0 (1.7)  | 91.4 (2.8)  |
| Enterodiol              | 5    | 5.6  | 96.9  | 10.3 | 87.0  | 74.1 (6.3)  | 97.4 (6.9)  |
|                         | 200  | 3.6  | 103.2 | 8.8  | 98.2  | 91.6 (0.2)  | 86.8 (5.3)  |
|                         | 766  | 10.6 | 88.0  | 3.0  | 85.2  | 94.2 (0.9)  | 95.9 (2.1)  |
| Urolithin A             | 12.5 | 14.5 | 112.1 | 15.4 | 136.2 | 7.8 (2.7)   | 79.9 (3.4)  |
|                         | 500  | 14.4 | 92.4  | 14.6 | 105.7 | 17.7 (5.3)  | 96.4 (3.8)  |
|                         | 1915 | 8.8  | 98.8  | 5.7  | 101.0 | 27.7 (8.9)  | 106.5 (8.6) |
| Enterolactone           | 5    | 4.9  | 89.8  | 12.3 | 100.9 | 53.9 (2.1)  | 101.0 (1.1) |
|                         | 200  | 4.7  | 105.6 | 6.8  | 110.2 | 72.5 (0.2)  | 95.9 (0.2)  |
|                         | 766  | 9.2  | 86.2  | 10.9 | 90.8  | 76.2 (3.1)  | 93.4 (3.6)  |
| Urolithin B             | 5    | 5.2  | 113.1 | 14.6 | 117.8 | 23.7 (9.3)  | 85.7 (9.0)  |
|                         | 200  | 4.8  | 98.3  | 10.9 | 108.8 | 34.0 (4.7)  | 85.7 (4.3)  |
|                         | 766  | 10.8 | 95.3  | 13.8 | 105.5 | 47.2 (5.9)  | 79.7 (13.2) |

RSD relative standard deviation, CV coefficient of variation.

**Table S4.** Identification of microbial phenolic metabolites in urine by HPLC/ESI-LTQ-Orbitrap-HRMS.

| Compound                                    | Neutral Mo-<br>lecular For-<br>mula | R <sub>t</sub><br>(min) | Ion mass [M-H]- |              | mDa<br>error | MS <sup>2</sup> fragment ions<br>[M-H]-   |
|---------------------------------------------|-------------------------------------|-------------------------|-----------------|--------------|--------------|-------------------------------------------|
|                                             |                                     |                         | Theoretical     | Experimental |              |                                           |
| Lignans - Lignans                           |                                     |                         |                 |              |              |                                           |
| Enterodiol <sup>a</sup>                     | C18H22O4                            | 9.17                    | 301.1434        | 301.1434     | 0.00         | 271.1334                                  |
| Enterodiol glucuronide I (ED)               | C24H30O10                           | 7.48                    | 477.1755        | 477.1751     | 0.40         | 459.1652, 301.1442,<br>175.0244           |
| Enterodiol glucuronide II (ED)              | C24H30O10                           | 7.61                    | 477.1755        | 477.1748     | 0.70         | 459.1644, 348.1826,<br>301.1436, 175.0242 |
| Enterodiol sulfate (ED)                     | C18H20O7S                           | 7.50                    | 381.0996        | 381.1005     | -0.90        | 382.1031, 301.1442                        |
| Enterolactone <sup>a</sup>                  | C18H18O4                            | 10.80                   | 297.1121        | 297.1114     | 0.70         | 253.12275, 217.0500,<br>107.0499          |
| Enterolactone glucuronide (EL)              | C24H26O10                           | 8.77                    | 473.1442        | 473.1434     | 0.80         | 455.1339, 343.0944,<br>297.1128, 175.0243 |
| Enterolactone diglucuronide (EL)            | C30H34O16                           | 7.24                    | 649.1763        | 649.1783     | -2.00        | 473.1469, 297.1135                        |
| Enterolactone sulfate (EL)                  | C18H18O7S                           | 8.57                    | 377.0683        | 377.0690     | -0.70        | 297.1131                                  |
| Phenolic acids-Hydroxybenzoic acids         |                                     |                         |                 |              |              |                                           |
| Gallic acid <sup>a</sup>                    | C7H6O5                              | 1.69                    | 169.0131        | 169.0141     | -1.00        | 125.0243                                  |
| Gallic acid glucuronide (GA)                | C13H14O11                           | 1.85                    | 345.0452        | 345.0447     | 0.50         | 169.0141, 125.0242                        |
| Gallic acid sulfate (GA)                    | C7H6O8S                             | 1.72                    | 248.9693        | 248.9700     | -0.70        | 230.0651,204.9810,<br>169.0141            |
| 3- hydroxybenzoic acid <sup>a</sup>         | C7H6O3                              | 4.02                    | 137.0233        | 137.0244     | -1.10        | 93.0342                                   |
| 4-hydroxybenzoic acid <sup>a</sup>          | C7H6O3                              | 3.15                    | 137.0233        | 137.0247     | -1.40        | 93.0342                                   |
| Hydroxybenzoic acid glucuronide I<br>(HBA)  | C13H14O9                            | 2.50                    | 313.0554        | 313.0548     | 0.60         | 175.0244, 137.0241,<br>93.0342            |
| Hydroxybenzoic acid glucuronide II<br>(HBA) | C13H14O9                            | 2.00                    | 313.0554        | 313.0551     | 0.30         | 295.0821,175.0245,<br>137.0242, 93.0136   |
| Hydroxybenzoic acid sulfate (HBA)           | C7H6O6S                             | 1.89                    | 216.9795        | 216.9809     | -1.40        | 137.0241, 172.9908,<br>93.0341            |
| Protocatechuic acid <sup>a</sup>            | C7H6O4                              | 2.25                    | 153.0182        | 153.0197     | -1.50        | 109.029                                   |
| Protocatechuic acid glucuronide<br>(PCA)    | C13H14O10                           | 1.67                    | 329.0503        | 329.0498     | 0.50         | 153.0189, 175.0189,<br>134.0469           |
| Protocatechuic acid sulfate I (PCA)         | C7H6O7S                             | 1.75                    | 232.9744        | 232.9753     | -0.90        | 153.0191, 188.9856,<br>109.0290, 96.9596  |
| Protocatechuic acid sulfate II (PCA)        | C7H6O7S                             | 1.94                    | 232.9744        | 232.9754     | -1.00        | 233.9755, 214.9653,<br>153.0034           |
| Syringic acid <sup>a</sup>                  | C9H10O5                             | 5.63                    | 197.0444        | 197.0459     | -1.50        | 153.0557, 121.0295                        |
| Syringic acid glucuronide I (SA)            | C15H18O11                           | 4.68                    | 373.0765        | 373.0760     | 0.50         | 355.1039, 329.1321,<br>197.0456, 175.0249 |
| Syringic acid glucuronide II (SA)           | C15H18O11                           | 4.88                    | 373.0765        | 373.0755     | 1.00         | 354.0912, 329.1267,<br>197.0817, 175.0246 |
| Syringic acid sulfate (SA)                  | C9H10O8S                            | 4.24                    | 277.0006        | 277.0008     | -0.20        | 197.0455, 182.0219,<br>167.0715           |
| Vanillic acid <sup>a</sup>                  | C8H8O4                              | 4.74                    | 167.0339        | 167.0354     | -1.50        | 123.0450                                  |
| Vanillic acid glucuronide I (VA)            | C14H16O10                           | 2.76                    | 343.0660        | 343.0651     | 0.90         | 175.0245, 167.0347,<br>123.0448           |
| Vanillic acid glucuronide II (VA)           | C14H16O10                           | 2.31                    | 343.0660        | 343.0650     | 1.00         | 175.0245, 167.0348,<br>131.9496           |

|                                                        |           |       |          |          |       |                                                        |
|--------------------------------------------------------|-----------|-------|----------|----------|-------|--------------------------------------------------------|
| Vanillic acid sulfate (VA)                             | C8H8O7S   | 2.03  | 246.9910 | 246.9910 | 0.00  | 203.0017, 167.0344,<br>123.0450                        |
| <b>Phenolic acids - Hydroxycinnamic acids</b>          |           |       |          |          |       |                                                        |
| <i>m</i> -coumaric acid <sup>a</sup>                   | C9H8O3    | 6.54  | 163.0390 | 163.0405 | -1.50 | 119.0500                                               |
| <i>o</i> -coumaric acid <sup>a</sup>                   | C9H8O3    | 7.20  | 163.0390 | 163.0403 | -1.30 | 119.0500                                               |
| <i>p</i> -coumaric acid <sup>a</sup>                   | C9H8O3    | 5.96  | 163.0390 | 163.0405 | -1.30 | 119.0500                                               |
| Coumaric acid glucuronide I                            | C15H16O9  | 4.77  | 339.0711 | 339.0710 | 0.10  | 321.0609, 175.0245,<br>163.0368                        |
| Coumaric acid glucuronide II                           | C15H16O9  | 5.09  | 339.0711 | 339.0707 | 0.40  | 295.0391, 175.0247,<br>163.0400, 119.0500              |
| Coumaric acid glucuronide III                          | C15H16O9  | 5.82  | 339.0711 | 339.0709 | 0.20  | 321.0612, 295.1294,<br>175.0250, 163.0403,<br>119.0502 |
| Coumaric acid sulfate I                                | C9H8O6S   | 3.53  | 242.9952 | 242.9953 | -0.10 | 199.0068, 163.0403,<br>119.0501, 96.9599               |
| Coumaric acid sulfate II                               | C9H8O6S   | 4.27  | 242.9952 | 242.9962 | -1.00 | 199.0034, 163.0398,<br>119.0493                        |
| Coumaric acid sulfate III                              | C9H8O6S   | 4.74  | 242.9952 | 242.9965 | -1.30 | 199.0062, 163.0399,<br>119.0497                        |
| <b>Phenolic acids - Hydroxyphenylacetic acids</b>      |           |       |          |          |       |                                                        |
| 3-hydroxyphenylacetic acid <sup>a</sup>                | C8H8O3    | 4.09  | 151.0390 | 151.0401 | -1.10 | 107.0208                                               |
| Hydroxyphenylacetic acid glucu-<br>ronide (3-HPAA)     | C14H16O9  | 4.8   | 327.0711 | 327.0709 | 0.20  | 309.0609, 175.0243,<br>151.0397                        |
| Hydroxyphenylacetic acid sulfate (3-<br>HPAA)          | C8H8O6S   | 2.24  | 230.9952 | 230.9963 | -1.10 | 151.0399, 108.0208                                     |
| <b>Phenolic acids - Hydroxyphenylpropanoic acids</b>   |           |       |          |          |       |                                                        |
| 3,4-dihydroxyphenylpropionic acid<br><sup>a</sup>      | C9H10O4   | 3.84  | 181.0495 | 181.0508 | -1.30 | 137.0603                                               |
| Dihydroxyphenylpropionic acid sul-<br>fate (3,4-DHPPA) | C9H10O7S  | 2.52  | 261.0057 | 261.0066 | -0.90 | 217.0160, 181.0504,<br>137.0603                        |
| <b>Stilbenes</b>                                       |           |       |          |          |       |                                                        |
| Dihydroresveratrol <sup>a</sup>                        | C14H14O3  | 8.73  | 229.0865 | 229.0874 | -0.90 | 185.0819                                               |
| Dihydroresveratrol sulfate I (DHR)                     | C14H14O6S | 7.07  | 309.0427 | 309.0430 | -0.30 | 245.0817, 229.0871,<br>193.0504, 123.0449              |
| Dihydroresveratrol sulfate II<br>(DHR)                 | C14H14O6S | 7.40  | 309.0427 | 309.0430 | -0.30 | 245.0810,<br>229.0861, 175.0235                        |
| <b>Other polyphenols - Hydroxycoumarins</b>            |           |       |          |          |       |                                                        |
| Urolithin A <sup>a</sup>                               | C13H8O4   | 9.56  | 227.0339 | 227.0353 | -1.40 | 183.0047                                               |
| Urolithin A glucuronide (Uro A)                        | C19H16O10 | 6.98  | 403.0659 | 403.0666 | -0.70 | 385.0551, 227.0344,<br>175.0243                        |
| Urolithin A diglucuronide (Uro A)                      | C25H24O16 | 6.88  | 579.0981 | 579.0988 | -0.70 | 403.0688, 227.0352                                     |
| Urolithin A sulfate (Uro A)                            | C13H8O7S  | 7.49  | 306.9901 | 306.9906 | -0.50 | 227.0347                                               |
| Urolithin B <sup>a</sup>                               | C13H8O3   | 11.12 | 211.0390 | 211.0404 | -1.40 | 167.0499                                               |
| Urolithin B glucuronide (Uro B)                        | C19H16O9  | 8.51  | 387.0711 | 387.0713 | -0.20 | 369.1538, 211.0393,<br>175.0242                        |
| <b>Other polyphenols -Tyrosols</b>                     |           |       |          |          |       |                                                        |
| 3-Hydroxytyrosol <sup>a</sup>                          | C8H10O3   | 2.11  | 153.0546 | 153.0561 | -1.50 | 123.0452                                               |
| 3'-hydroxytyrosol-3'-glucuronide <sup>a</sup>          | C14H18O9  | 2.11  | 329.0873 | 329.0878 | -0.50 | 153.056, 123.0452                                      |
| Hydroxytyrosol sulfate (3-HT)                          | C8H10O6S  | 1.82  | 233.0108 | 233.0113 | -0.50 | 153.0557, 188.9862,<br>96.9600                         |

<sup>a</sup>commercial standards, Rt retention time, mDa millidalton of error between the mass found and the accurate mass of each (poly)phenol (absolute value). 3,4-DHPPA 3,4-dihydroxyphenylpropionic acid, 3-HPAA 3-hydroxyphenylacetic acid, 3-HBA 3-hydroxybenzoic acid, 3-HT 3-hydroxytyrosol,

3-HT-G 3-Hydroxytyrosol glucuronide, 4-HBA 4-hydroxybenzoic acid, DHRSV Dihydroresveratrol, ED enterodiol, EL enterolactone, GA gallic acid, PCA protocatechuic acid, SA syringic acid, Uro A urolithin A, Uro B urolithin B, VA vanillic acid. When standards were not available, the aglycone was used for quantification (shown in brackets).

**Table S5.** Pearson correlation coefficients between microbial phenolic metabolites and dietary polyphenols in adolescents.

| Parameter1                    | Parameter2                           | R     | 95% CI |       | P-value          |
|-------------------------------|--------------------------------------|-------|--------|-------|------------------|
|                               |                                      |       | Low    | High  |                  |
| Urinary lignans               | Urinary hydroxycoumarins acids       | 0.09  | 0.01   | 0.17  | 0.058            |
| Urinary lignans               | Urinary tyrosols                     | 0.03  | -0.05  | 0.11  | 0.654            |
| Urinary lignans               | Urinary hydroxybenzoic acids         | -0.12 | -0.20  | -0.04 | <b>0.011</b>     |
| Urinary lignans               | Urinary hydroxycinnamic acids        | 0.25  | 0.18   | 0.33  | <b>&lt;0.001</b> |
| Urinary lignans               | Urinary hydroxyphenylacetic acids    | 0.11  | 0.03   | 0.19  | <b>0.021</b>     |
| Urinary lignans               | Urinary hydroxyphenylpropionic acids | 0.05  | -0.03  | 0.13  | 0.389            |
| Urinary lignans               | Urinary stilbenes                    | 0.34  | 0.27   | 0.41  | <b>&lt;0.001</b> |
| Urinary lignans               | Flavonoid intake                     | 0.02  | -0.06  | 0.11  | 0.712            |
| Urinary lignans               | Phenolic acid intake                 | 0.05  | -0.04  | 0.13  | 0.468            |
| Urinary lignans               | Stilbene intake                      | 0.02  | -0.07  | 0.10  | 0.797            |
| Urinary lignans               | Lignan intake                        | 0.09  | 0.01   | 0.18  | 0.073            |
| Urinary lignans               | Tyrosol intake                       | 0.06  | -0.02  | 0.15  | 0.278            |
| Urinary lignans               | Total polyphenol intake              | 0.04  | -0.05  | 0.12  | 0.560            |
| Urinary hydroxycoumarin acids | Urinary tyrosols                     | 0.06  | -0.02  | 0.14  | 0.286            |
| Urinary hydroxycoumarin acids | Urinary hydroxybenzoic acids         | -0.04 | -0.12  | 0.04  | 0.468            |
| Urinary hydroxycoumarin acids | Urinary hydroxycinnamic acids        | 0.11  | 0.03   | 0.19  | <b>0.021</b>     |
| Urinary hydroxycoumarin acids | Urinary hydroxyphenylacetic acids    | 0.08  | 0.00   | 0.16  | 0.123            |
| Urinary hydroxycoumarin acids | Urinary hydroxyphenylpropionic acids | -0.04 | -0.12  | 0.04  | 0.515            |
| Urinary hydroxycoumarin acids | Urinary stilbenes                    | 0.04  | -0.04  | 0.12  | 0.515            |
| Urinary hydroxycoumarin acids | Flavonoid intake                     | 0.13  | 0.05   | 0.21  | <b>0.008</b>     |
| Urinary hydroxycoumarin acids | Phenolic acids intake                | 0.08  | 0.00   | 0.17  | 0.123            |
| Urinary hydroxycoumarin acids | Stilbens intake                      | 0.08  | -0.01  | 0.16  | 0.156            |
| Urinary hydroxycoumarin acids | Lignan intake                        | 0.04  | -0.04  | 0.13  | 0.497            |
| Urinary hydroxycoumarin acids | Tyrosol intake                       | 0.03  | -0.05  | 0.11  | 0.608            |
| Urinary hydroxycoumarin acids | Total polyphenol intake              | 0.13  | 0.05   | 0.21  | <b>0.008</b>     |
| Urinary tyrosols              | Urinary hydroxybenzoic acids         | 0.26  | 0.19   | 0.34  | <b>&lt;0.001</b> |
| Urinary tyrosols              | Urinary hydroxycinnamic acids        | 0.17  | 0.09   | 0.25  | <b>&lt;0.001</b> |
| Urinary tyrosols              | Urinary hydroxyphenylacetic acids    | 0.12  | 0.04   | 0.19  | <b>0.015</b>     |
| Urinary tyrosols              | Urinary hydroxyphenylpropionic acids | 0.13  | 0.05   | 0.20  | <b>0.008</b>     |
| Urinary tyrosols              | Urinary stilbenes                    | 0.00  | -0.08  | 0.08  | 0.952            |
| Urinary tyrosols              | Flavonoid intake                     | -0.03 | -0.11  | 0.06  | 0.654            |
| Urinary tyrosols              | Phenolic acids intake                | -0.05 | -0.14  | 0.03  | 0.389            |
| Urinary tyrosols              | Stilbene intake                      | -0.05 | -0.14  | 0.03  | 0.389            |
| Urinary tyrosols              | Lignan intake                        | -0.01 | -0.09  | 0.07  | 0.857            |
| Urinary tyrosols              | Tyrosol intake                       | 0.08  | -0.01  | 0.16  | 0.153            |
| Urinary tyrosols              | Total polyphenol intake              | -0.02 | -0.11  | 0.06  | 0.675            |
| Urinary hydroxybenzoic acids  | Urinary hydroxycinnamic acids        | -0.03 | -0.11  | 0.05  | 0.585            |
| Urinary hydroxybenzoic acids  | Urinary hydroxyphenylacetic acids    | -0.11 | -0.19  | -0.03 | <b>0.016</b>     |
| Urinary hydroxybenzoic acids  | Urinary hydroxyphenylpropionic acids | 0.23  | 0.15   | 0.30  | <b>&lt;0.001</b> |
| Urinary hydroxybenzoic acids  | Urinary stilbenes                    | -0.03 | -0.11  | 0.05  | 0.585            |
| Urinary hydroxybenzoic acids  | Flavonoid intake                     | -0.01 | -0.10  | 0.07  | 0.847            |
| Urinary hydroxybenzoic acids  | Phenolic acid intake                 | -0.02 | -0.11  | 0.06  | 0.712            |
| Urinary hydroxybenzoic acids  | Stilbene intake                      | -0.05 | -0.13  | 0.04  | 0.468            |
| Urinary hydroxybenzoic acids  | Lignans intake                       | 0.02  | -0.06  | 0.10  | 0.722            |
| Urinary hydroxybenzoic acids  | Tyrosol intake                       | 0.05  | -0.03  | 0.14  | 0.389            |
| Urinary hydroxybenzoic acids  | Total polyphenol intake              | -0.01 | -0.09  | 0.08  | 0.927            |

|                                      |                                      |       |       |      |                  |
|--------------------------------------|--------------------------------------|-------|-------|------|------------------|
| Urinary hydroxycinnamic acids        | Urinary hydroxyphenylacetic acids    | 0.29  | 0.21  | 0.36 | <b>&lt;0.001</b> |
| Urinary hydroxycinnamic acids        | Urinary hydroxyphenylpropionic acids | 0.33  | 0.25  | 0.40 | <b>&lt;0.001</b> |
| Urinary hydroxycinnamic acids        | Urinary stilbenes                    | 0.30  | 0.22  | 0.37 | <b>&lt;0.001</b> |
| Urinary hydroxycinnamic acids        | Flavonoid intake                     | -0.04 | -0.12 | 0.05 | 0.560            |
| Urinary hydroxycinnamic acids        | Phenolic acid intake                 | 0.05  | -0.03 | 0.13 | 0.441            |
| Urinary hydroxycinnamic acids        | Stilbene intake                      | 0.01  | -0.07 | 0.10 | 0.843            |
| Urinary hydroxycinnamic acids        | Lignan intake                        | 0.09  | 0.00  | 0.17 | 0.092            |
| Urinary hydroxycinnamic acids        | Tyrosol intake                       | 0.09  | 0.01  | 0.18 | 0.077            |
| Urinary hydroxycinnamic acids        | Total polyphenol intake              | -0.02 | -0.11 | 0.06 | 0.684            |
| Urinary hydroxyphenylacetic acids    | Urinary hydroxyphenylpropionic acids | 0.27  | 0.19  | 0.34 | <b>&lt;0.001</b> |
| Urinary hydroxyphenylacetic acids    | Urinary stilbenes                    | 0.13  | 0.05  | 0.21 | <b>0.005</b>     |
| Urinary hydroxyphenylacetic acids    | Flavonoid intake                     | 0.03  | -0.05 | 0.11 | 0.608            |
| Urinary hydroxyphenylacetic acids    | Phenolic acids intake                | 0.04  | -0.04 | 0.12 | 0.515            |
| Urinary hydroxyphenylacetic acids    | Stilbene intake                      | -0.01 | -0.09 | 0.08 | 0.928            |
| Urinary hydroxyphenylacetic acids    | Lignan intake                        | 0.04  | -0.04 | 0.12 | 0.505            |
| Urinary hydroxyphenylacetic acids    | Tyrosol intake                       | 0.00  | -0.08 | 0.09 | 0.946            |
| Urinary hydroxyphenylacetic acids    | Total polyphenol intake              | 0.03  | -0.05 | 0.12 | 0.585            |
| Urinary hydroxyphenylpropionic acids | Urinary stilbenes                    | 0.12  | 0.04  | 0.20 | <b>0.011</b>     |
| Urinary hydroxyphenylpropionic acids | Flavonoid intake                     | -0.05 | -0.13 | 0.04 | 0.441            |
| Urinary hydroxyphenylpropionic acids | Phenolic acid intake                 | -0.03 | -0.11 | 0.06 | 0.663            |
| Urinary hydroxyphenylpropionic acids | Stilbene intake                      | -0.03 | -0.12 | 0.05 | 0.585            |
| Urinary hydroxyphenylpropionic acids | Lignan intake                        | 0.04  | -0.04 | 0.13 | 0.505            |
| Urinary hydroxyphenylpropionic acids | Tyrosol intake                       | 0.02  | -0.07 | 0.10 | 0.788            |
| Urinary hydroxyphenylpropionic acids | Total polyphenol intake              | -0.05 | -0.13 | 0.04 | 0.441            |
| Urinary stilbenes                    | Flavonoid intake                     | 0.09  | 0.01  | 0.17 | 0.081            |
| Urinary stilbenes                    | Phenolic acid intake                 | 0.00  | -0.08 | 0.08 | 0.991            |
| Urinary stilbenes                    | Stilbene intake                      | 0.03  | -0.05 | 0.11 | 0.608            |
| Urinary stilbenes                    | Lignan intake                        | -0.07 | -0.15 | 0.02 | 0.234            |
| Urinary stilbenes                    | Tyrosol intake                       | 0.01  | -0.08 | 0.09 | 0.927            |
| Urinary stilbenes                    | Total polyphenol intake              | 0.09  | 0.01  | 0.18 | 0.074            |
| Flavonoid intake                     | Phenolic acid intake                 | 0.51  | 0.45  | 0.57 | <b>&lt;0.001</b> |
| Flavonoid intake                     | Stilbene intake                      | 0.60  | 0.54  | 0.65 | <b>&lt;0.001</b> |
| Flavonoid intake                     | Lignan intake                        | 0.23  | 0.15  | 0.31 | <b>&lt;0.001</b> |
| Flavonoid intake                     | Tyrosol intake                       | 0.05  | -0.04 | 0.13 | 0.468            |
| Flavonoid intake                     | Total polyphenol intake              | 0.98  | 0.98  | 0.98 | <b>&lt;0.001</b> |
| Phenolic acid intake                 | Stilbene intake                      | 0.60  | 0.54  | 0.65 | <b>&lt;0.001</b> |
| Phenolic acid intake                 | Lignan intake                        | 0.49  | 0.42  | 0.55 | <b>&lt;0.001</b> |



|                      |                         |      |       |      |                  |
|----------------------|-------------------------|------|-------|------|------------------|
| Phenolic acid intake | Tyrosol intake          | 0.16 | 0.08  | 0.24 | <b>0.001</b>     |
| Phenolic acid intake | Total polyphenol intake | 0.62 | 0.56  | 0.67 | <b>&lt;0.001</b> |
| Stilbene intake      | Lignan intake           | 0.28 | 0.20  | 0.36 | <b>&lt;0.001</b> |
| Stilbene intake      | Tyrosol intake          | 0.07 | −0.01 | 0.15 | 0.219            |
| Stilbene intake      | Total polyphenol intake | 0.63 | 0.57  | 0.67 | <b>&lt;0.001</b> |
| Lignan intake        | Tyrosol intake          | 0.13 | 0.04  | 0.21 | <b>0.011</b>     |
| Lignan intake        | Total polyphenol intake | 0.29 | 0.21  | 0.37 | <b>&lt;0.001</b> |
| Tyrosol intake       | Total polyphenol intake | 0.09 | 0.01  | 0.17 | 0.081            |

CI confidence interval, R correlation coefficient. False discovery rate method (Benjamini & Hochberg, 1995) was used to adjust *p*-values. *p*-values < 0.5 are in bold.

## References

1. Martínez-Huélamo, M.; Tulipani, S.; Jáuregui, O.; Valderas-Martinez, P.; Vallverdú-Queralt, A.; Estruch, R.; Torrado, X.; Lamuela-Raventós, R. Sensitive and Rapid UHPLC-MS/MS for the Analysis of Tomato Phenolics in Human Biological Samples. *Molecules* **2015**, *20*, 20409–20425, doi:10.3390/molecules201119702.
2. Martínez-Huélamo, M.; Tulipani, S.; Torrado, X.; Estruch, R.; Lamuela-Raventós, R.M. Validation of a New LC-MS/MS Method for the Detection and Quantification of Phenolic Metabolites from Tomato Sauce in Biological Samples. *Journal of Agricultural and Food Chemistry* **2012**, *60*, 4542–4549, doi:10.1021/jf205266h.
3. Quifer-Rada, P.; Martínez-Huélamo, M.; Jáuregui, O.; Chiva-Blanch, G.; Estruch, R.; Lamuela-Raventós, R.M. Analytical Condition Setting a Crucial Step in the Quantification of Unstable Polyphenols in Acidic Conditions: Analyzing Prenylflavanoids in Biological Samples by Liquid Chromatography-Electrospray Ionization Triple Quadrupole Mass Spectrometry. *Analytical Chemistry* **2013**, *85*, 5547–5554, doi:10.1021/AC4007733
